# Supplementary material
Source: PubMed Central journal article supplement (PMC3378481)
Supplement: NIHMS37018-supplement-Table_2.pdf [file NIHMS37018-supplement-Table_2.pdf]

|                                            | CONTROL      |        |       | EXPOSED      |        |       |              |        | PRE-EXPOSED  |        |       |              |        |
|--------------------------------------------|--------------|--------|-------|--------------|--------|-------|--------------|--------|--------------|--------|-------|--------------|--------|
|                                            | Mean         | 95% CI |       | Mean         | 95% CI |       | t / $\chi^2$ | p      | Mean         | 95% CI |       | t / $\chi^2$ | p      |
| <i>Individual level co-variates</i>        |              |        |       |              |        |       |              |        |              |        |       |              |        |
| BMI (kg/m <sup>2</sup> )                   | <b>25.43</b> | 25.21  | 25.65 | <b>25.16</b> | 24.92  | 25.39 | 1.67         | 0.10   | <b>25.18</b> | 24.93  | 25.42 | 1.53         | 0.13   |
| age (years)                                | <b>33.05</b> | 32.67  | 33.44 | <b>34.02</b> | 33.50  | 34.54 | -2.98        | <0.01  | <b>33.80</b> | 33.30  | 34.29 | -2.36        | <0.01  |
| community participation                    | <b>17.5</b>  | 15.4   | 19.5  | <b>34.5</b>  | 31.6   | 37.4  | -9.68        | <0.001 | <b>24.3</b>  | 21.7   | 27.0  | -4.10        | <0.001 |
| parity (number of reported live births)    | <b>4.44</b>  | 4.29   | 4.59  | <b>4.73</b>  | 4.55   | 4.91  | -2.42        | 0.02   | <b>4.28</b>  | 4.12   | 4.44  | 1.37         | 0.17   |
| primary education incomplete               | <b>58.4</b>  | 55.8   | 61.1  | <b>62.0</b>  | 59.0   | 65.0  |              |        | <b>60.9</b>  | 57.9   | 64.0  |              |        |
| primary education complete                 | <b>34.9</b>  | 32.3   | 37.4  | <b>31.8</b>  | 28.9   | 34.7  |              |        | <b>32.5</b>  | 29.6   | 35.4  |              |        |
| secondary education complete               | <b>5.3</b>   | 4.1    | 6.4   | <b>5.4</b>   | 4.0    | 6.7   | 4.75         | 0.19   | <b>5.2</b>   | 3.8    | 6.5   | 1.59         | 0.66   |
| further education                          | <b>1.4</b>   | 0.8    | 2.0   | <b>0.8</b>   | 0.2    | 1.3   |              |        | <b>1.4</b>   | 0.7    | 2.1   |              |        |
| <i>Household level co-variates</i>         |              |        |       |              |        |       |              |        |              |        |       |              |        |
| household size (persons)                   | <b>6.20</b>  | 6.08   | 6.33  | <b>6.22</b>  | 6.08   | 6.36  | -0.15        | 0.88   | <b>5.95</b>  | 5.81   | 6.08  | 2.65         | 0.01   |
| persons per room                           | <b>3.08</b>  | 2.99   | 3.18  | <b>2.71</b>  | 2.63   | 2.80  | 5.53         | <0.001 | <b>2.86</b>  | 2.77   | 2.96  | 3.15         | <0.001 |
| log household wealth (pesos)               | <b>12.76</b> | 12.73  | 12.79 | <b>12.80</b> | 12.76  | 12.84 | -1.41        | 0.16   | <b>12.96</b> | 12.93  | 12.99 | -8.50        | <0.001 |
| pipied water to household                  | <b>64.1</b>  | 61.5   | 66.6  | <b>63.7</b>  | 60.8   | 66.7  | 0.16         | 0.87   | <b>53.5</b>  | 50.4   | 56.6  | 5.21         | <0.01  |
| semi-urban location                        | <b>55.5</b>  | 52.9   | 58.2  | <b>43.9</b>  | 40.9   | 47.0  | 5.61         | <0.001 | <b>42.3</b>  | 39.2   | 45.3  | 6.43         | <0.001 |
| <i>Area level co-variates</i>              |              |        |       |              |        |       |              |        |              |        |       |              |        |
| log population                             | <b>9.80</b>  | 9.76   | 9.85  | <b>9.90</b>  | 9.86   | 9.95  | -2.99        | <0.001 | <b>10.21</b> | 10.17  | 10.26 | -12.33       | <0.001 |
| log eligible families                      | <b>6.25</b>  | 6.19   | 6.31  | <b>6.82</b>  | 6.76   | 6.87  | -13.03       | <0.001 | <b>7.20</b>  | 7.14   | 7.25  | -21.77       | <0.001 |
| quality of life index                      | <b>55.65</b> | 55.08  | 56.22 | <b>53.06</b> | 52.46  | 53.65 | 6.07         | <0.001 | <b>54.24</b> | 53.69  | 54.80 | 3.38         | <0.001 |
| ratio of doctors to population             | <b>-1.18</b> | -1.20  | -1.16 | <b>-1.32</b> | -1.35  | -1.29 | 7.63         | <0.001 | <b>-1.42</b> | -1.45  | -1.39 | 12.58        | <0.001 |
| average household wealth                   | <b>12.90</b> | 12.89  | 12.92 | <b>12.92</b> | 12.90  | 12.93 | -1.86        | 0.06   | <b>12.99</b> | 12.98  | 13.00 | -12.16       | <0.001 |
| average travel time to medical centre      | <b>36.46</b> | 35.19  | 37.72 | <b>35.48</b> | 34.65  | 36.31 | 1.18         | 0.24   | <b>39.95</b> | 38.83  | 41.07 | -3.92        | <0.01  |
| proportion of households with pipied water | <b>65.6</b>  | 64.3   | 66.8  | <b>64.0</b>  | 62.8   | 65.2  | 1.76         | 0.08   | <b>54.3</b>  | 53.1   | 55.5  | 12.63        | <0.001 |
| presence of a bank                         | <b>38.2</b>  | 36.2   | 41.8  | <b>99.2</b>  | 98.8   | 99.8  | -39.41       | <0.001 | <b>100.0</b> | 100.0  | 100.0 | -40.27       | <0.001 |

### Supplementary Table 2: Characteristics of women at baseline by exposure

(figures are percentages unless otherwise indicated; Controls form the reference group for all t- and chi-squared tests)
